# Supplementary material for: Conserved neural circuit structure across Drosophila larval development revealed by comparative connectomics
Source: eLife journal article supplement (doi:10.7554/elife.29089), 2017-10-23

# Local Neurons

A02m (1) - a1L

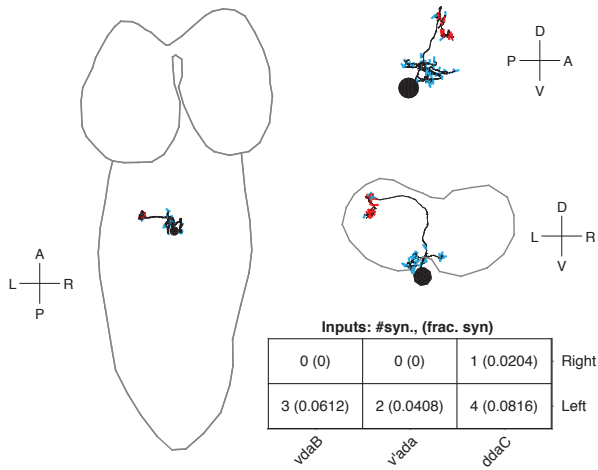

A02m (1) - a1R

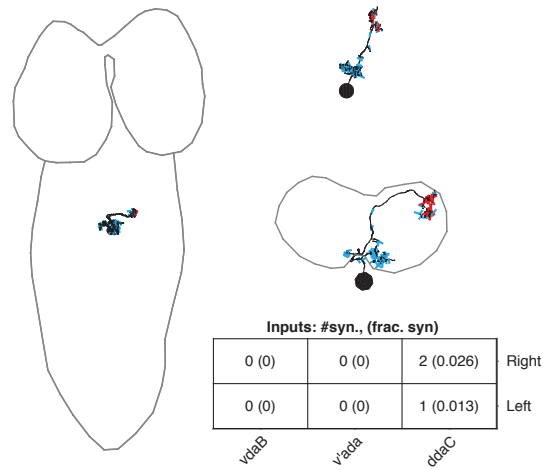

A02m (2) - a1L

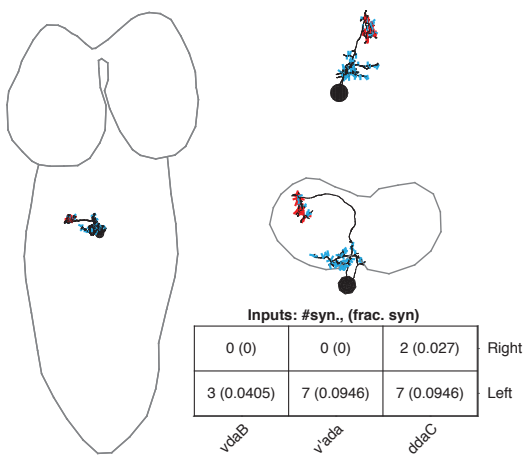

A02m (1) - a1R

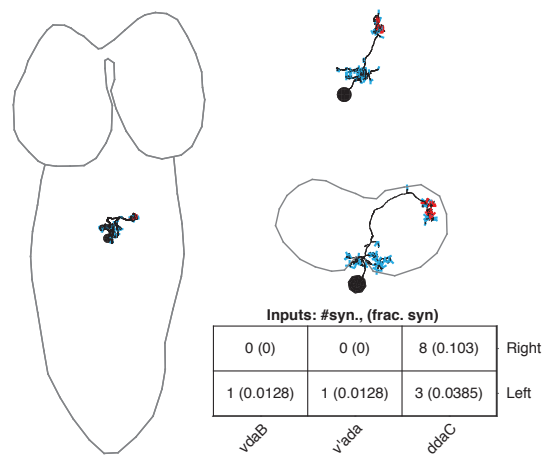

A09a - a1L (Basin-2)

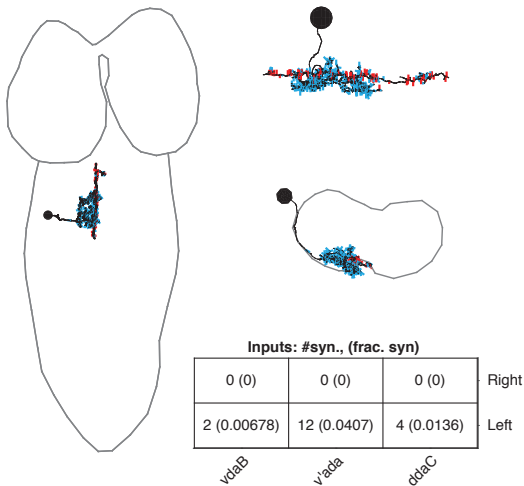

A09a - a1R (Basin-2)

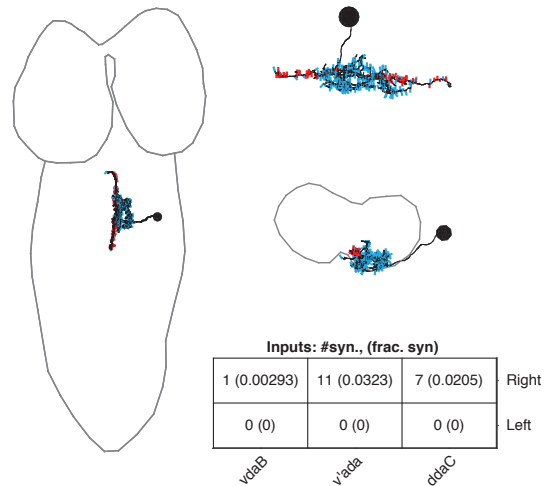

A09c - a1L (Basin-4)

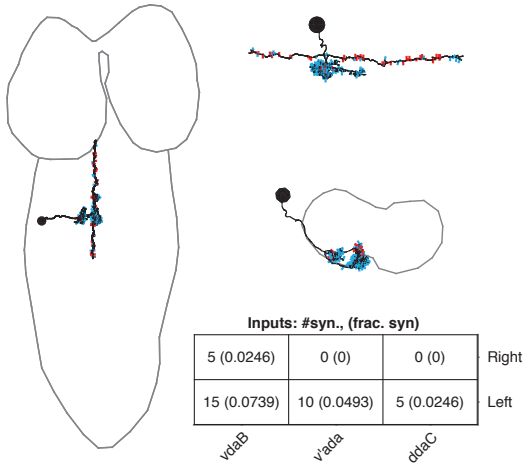

A09c - a1R (Basin-4)

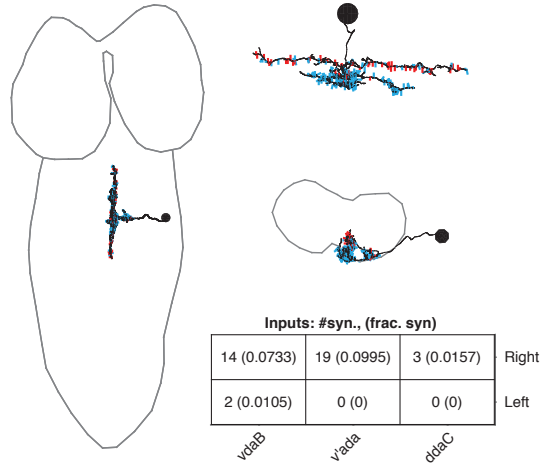

A09l - a1L

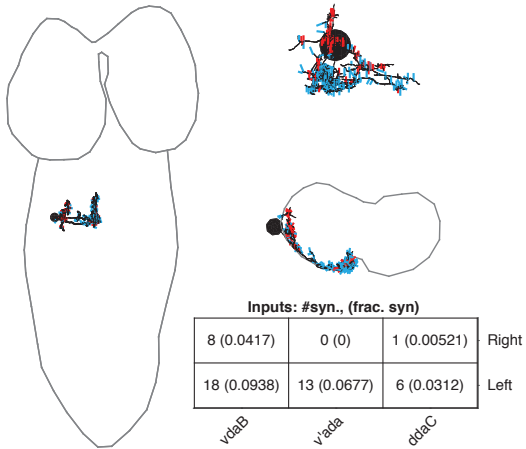

A09l - a1R

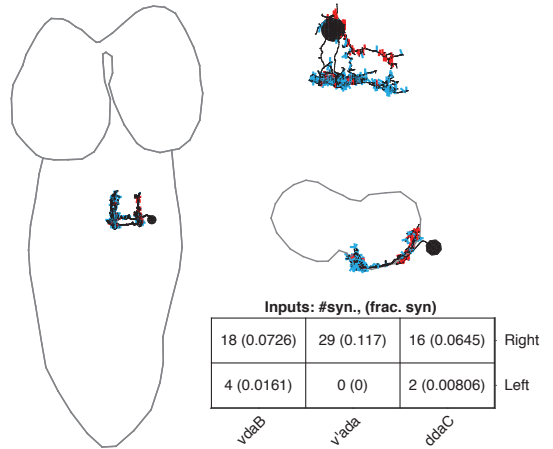

A10a - a1L

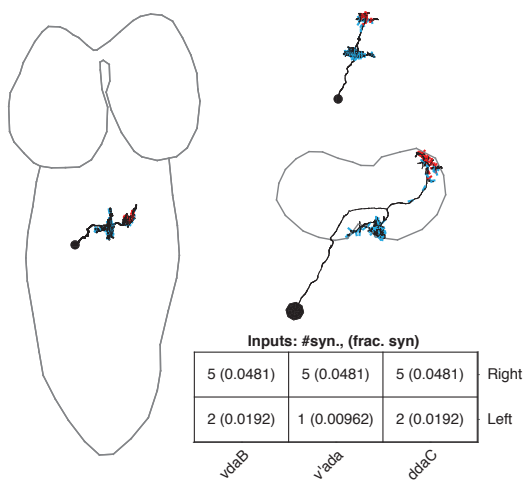

A10a - a1R

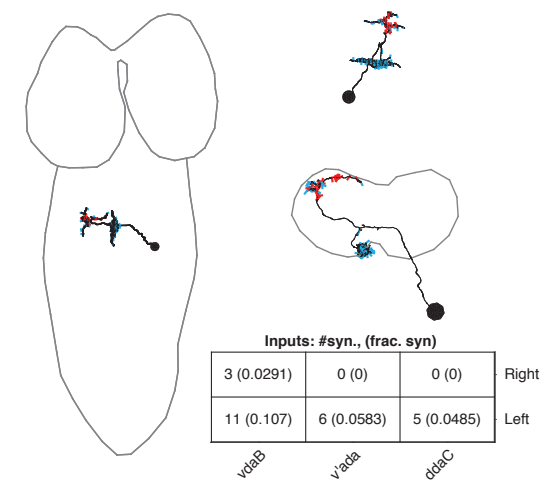

# Regional Neurons

A02o - a2L

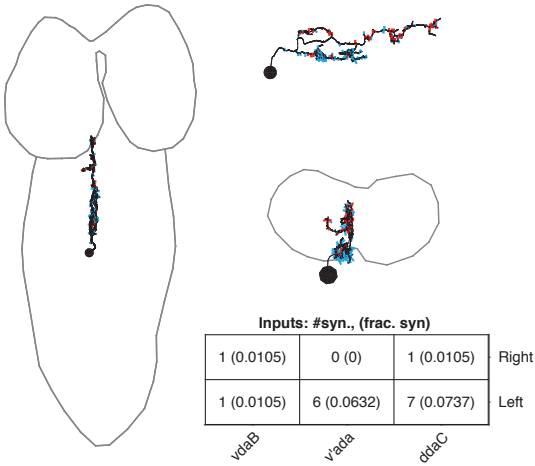

A02o - a2R

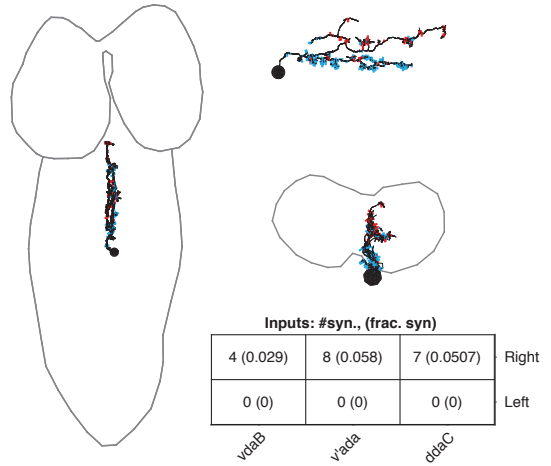

A09e - a3L

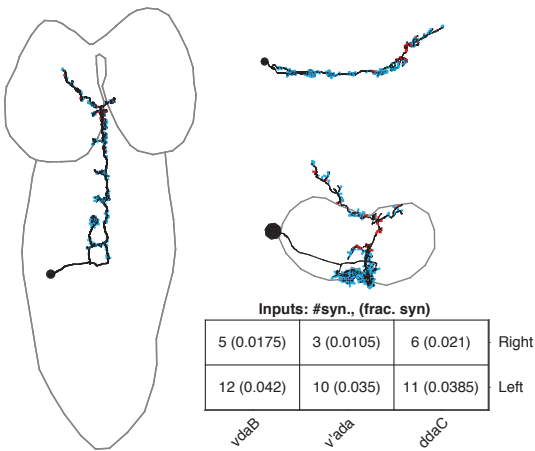

A09e - a3R

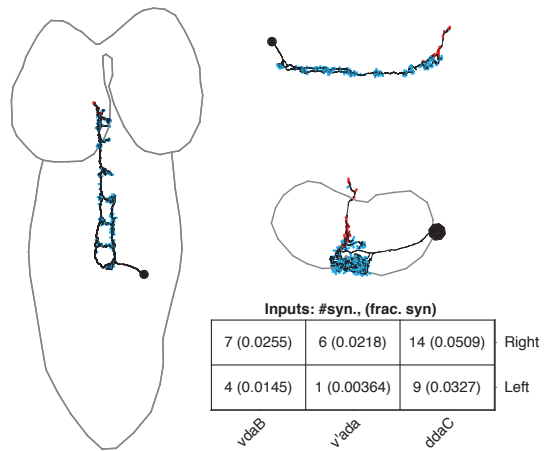

A09o - a3L

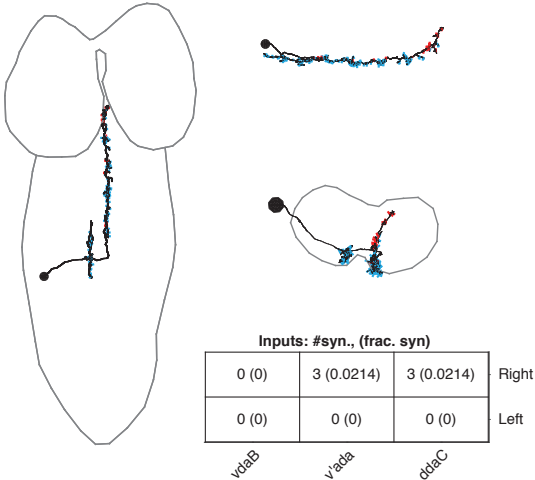

A09o - a3R

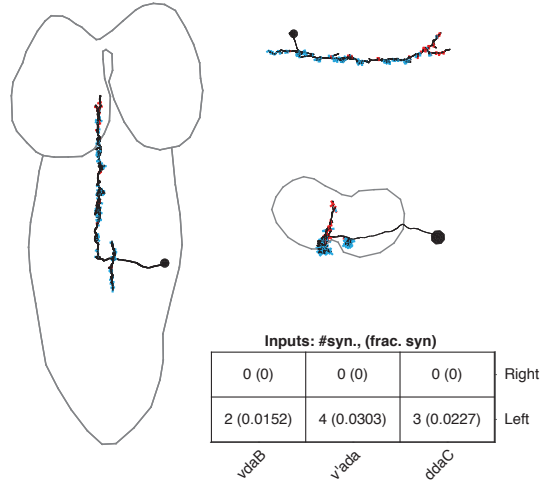

## Descending Neurons

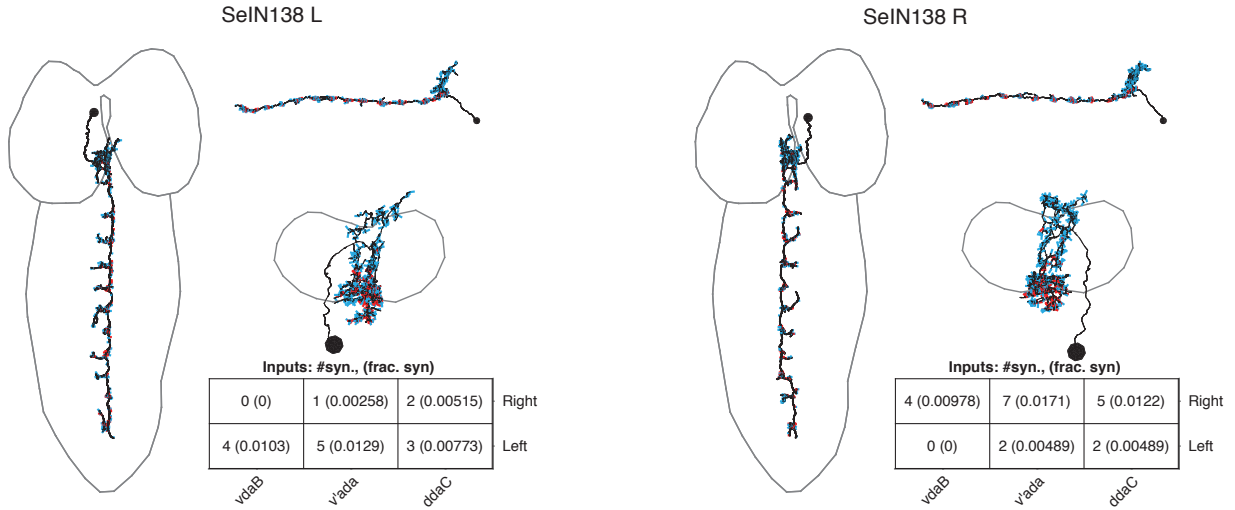

## Ascending Neurons

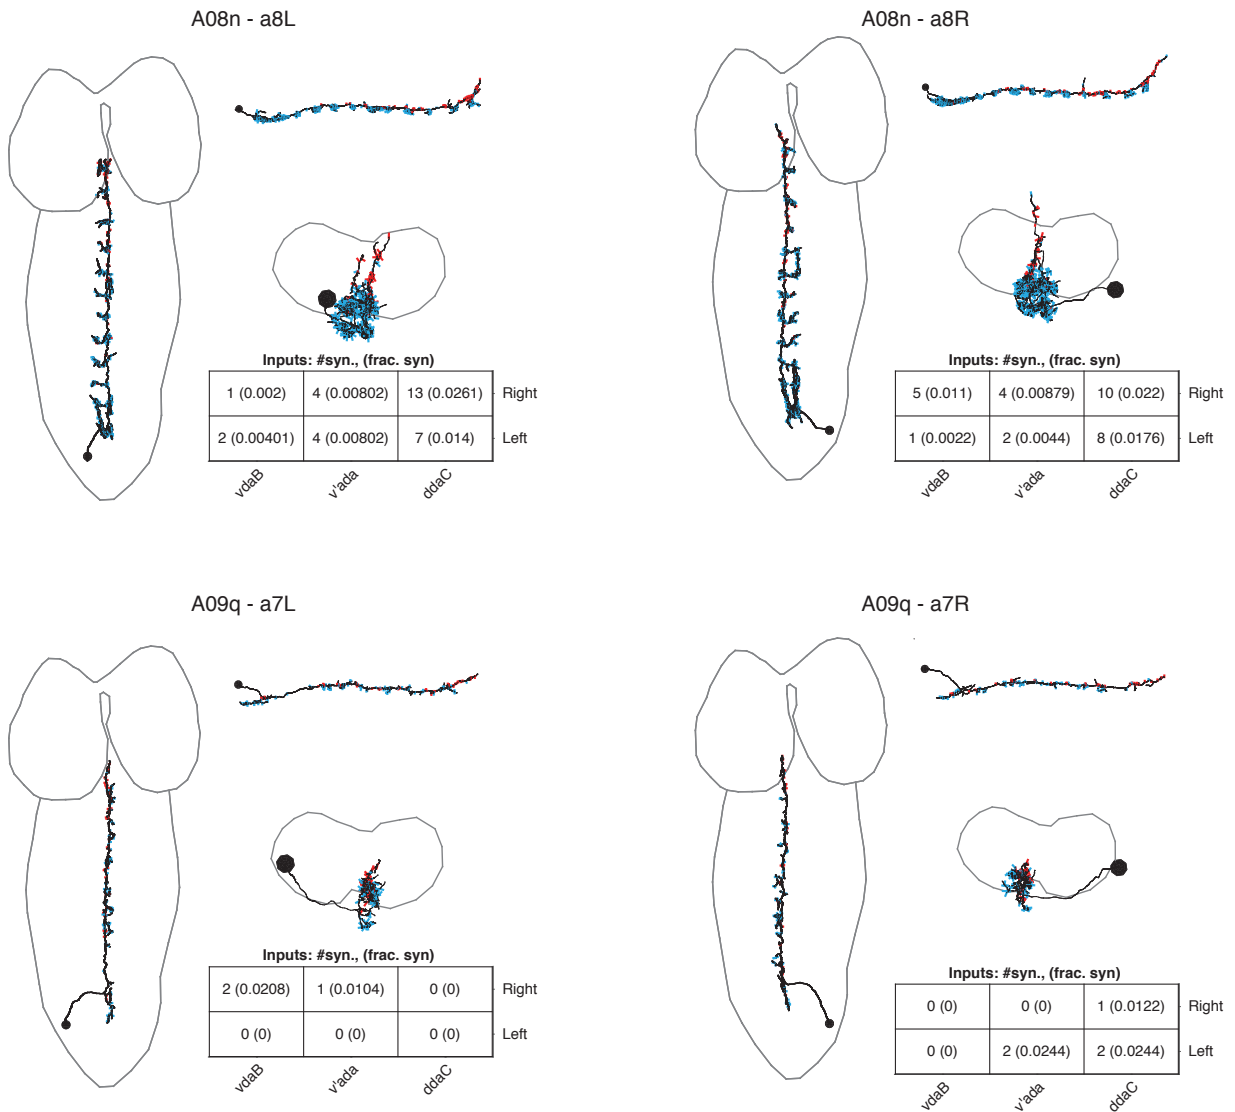

TePn05 L (incomplete)

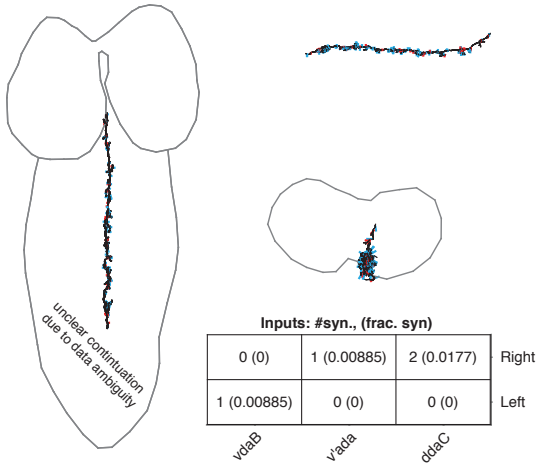

TePn05 R

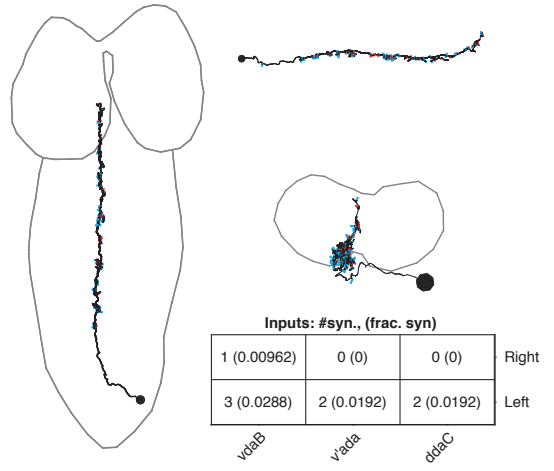

TePn18 L

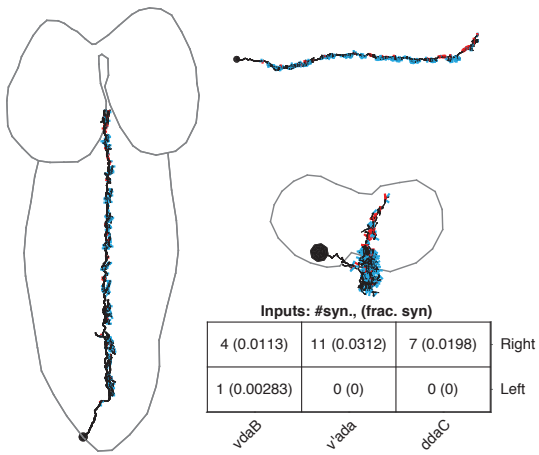

TePn18 R

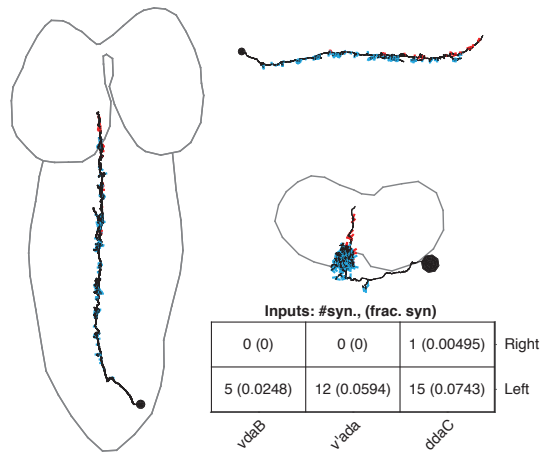

Supplement: supp [file elife_poa_e29089_Supplementary_File_1.pdf › elife_poa_e29089_Supplementary_File_1.pdf]
