# Supplementary figures and images for: Conserved neural circuit structure across Drosophila larval development revealed by comparative connectomics
Source: eLife journal article supplement (doi:10.7554/elife.29089), 2017-10-23

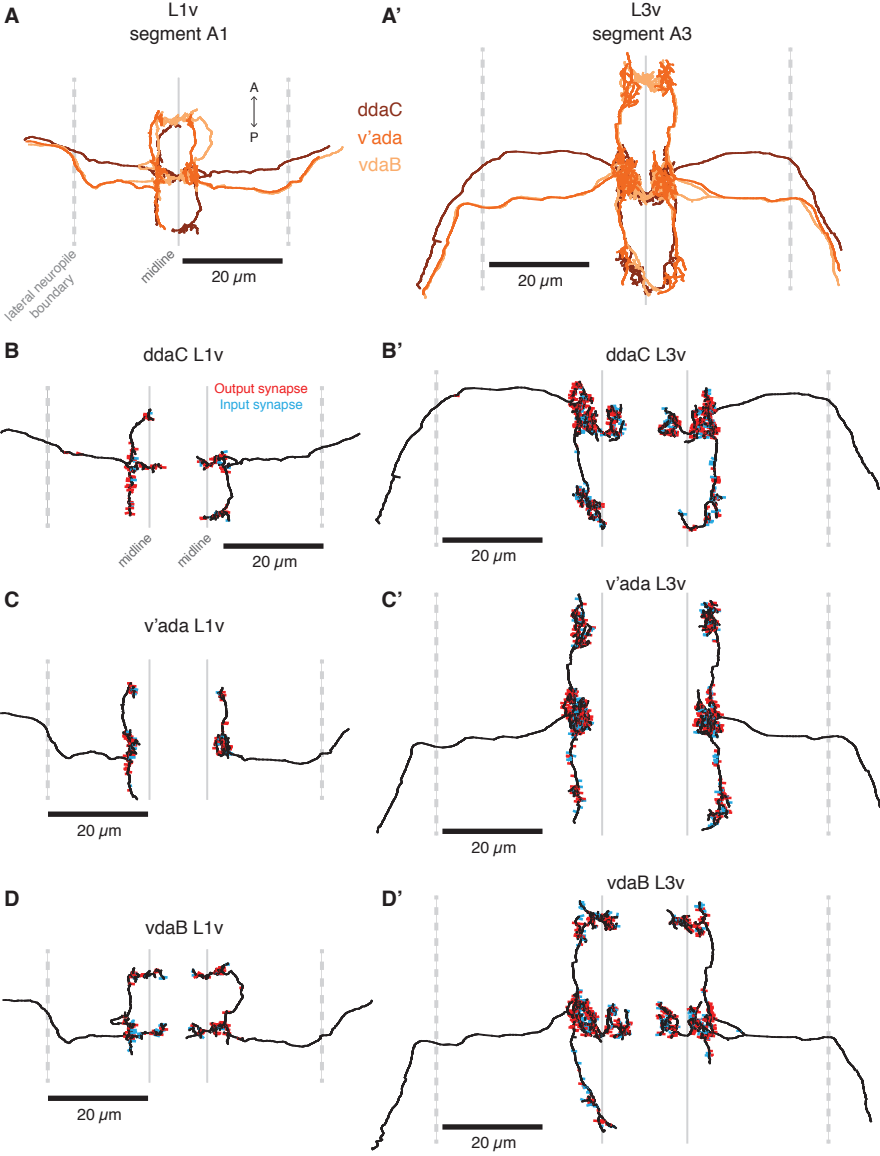

Supplement: supp [file elife_poa_e29089_Figure_1_figure_supplement_2.pdf › elife_poa_e29089_Figure_1_figure_supplement_2.pdf]

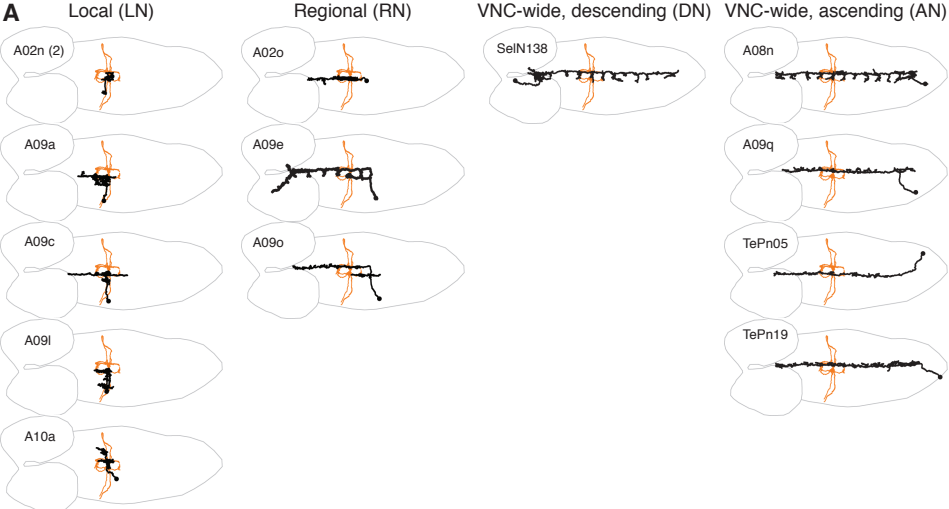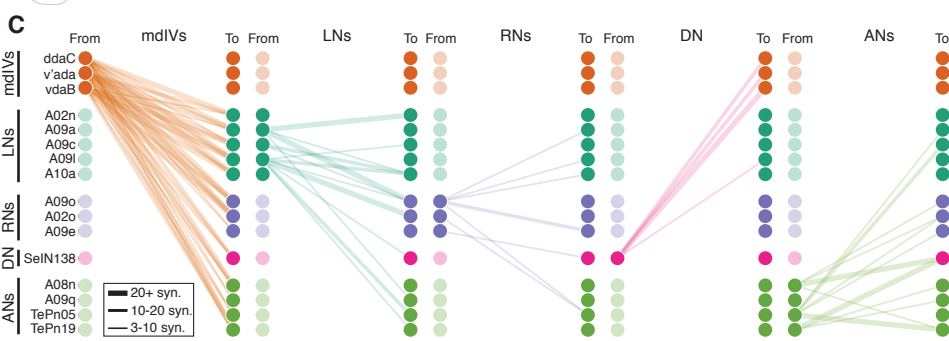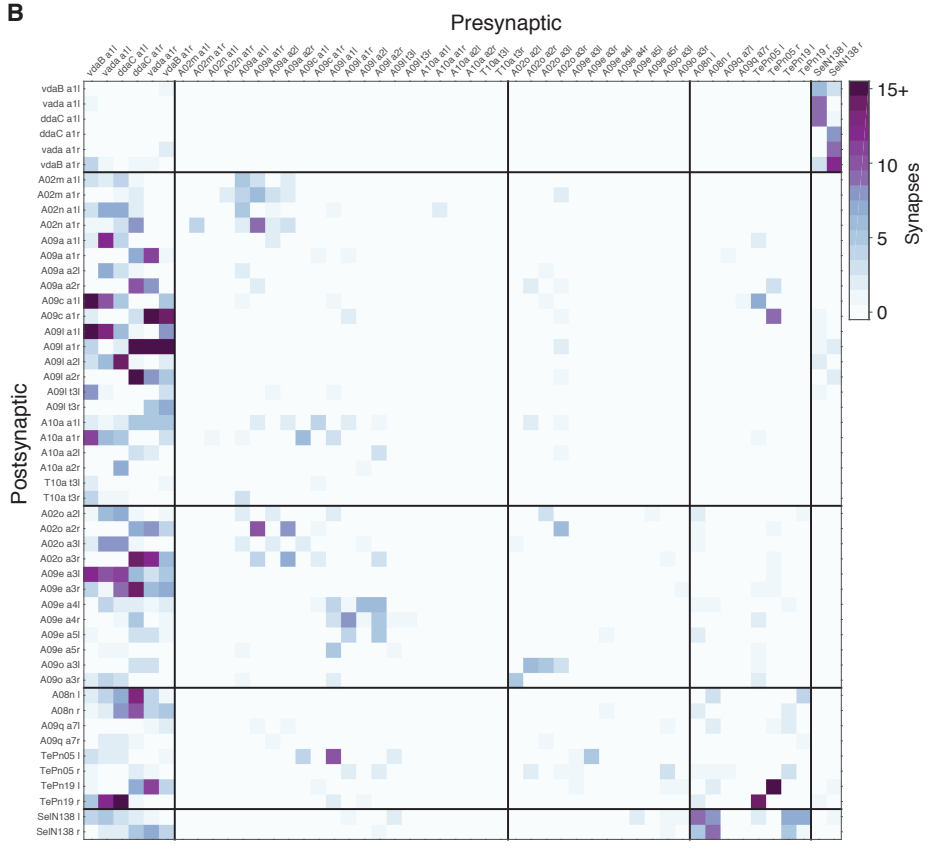

Supplement: supp [file elife_poa_e29089_Figure_2_figure_supplement_1.pdf › elife_poa_e29089_Figure_2_figure_supplement_1.pdf]

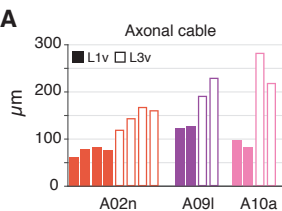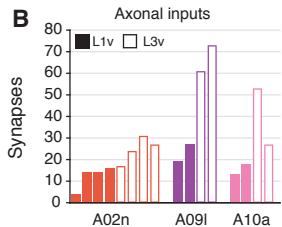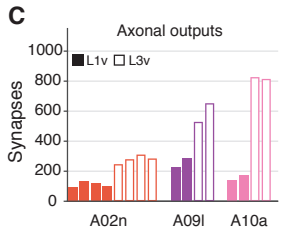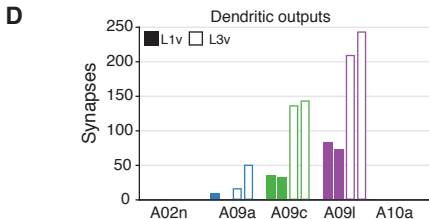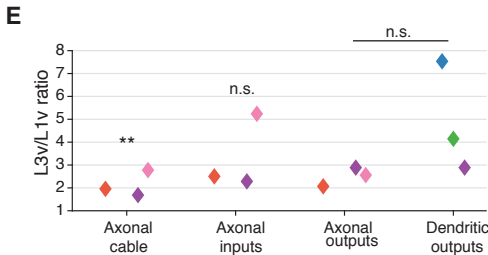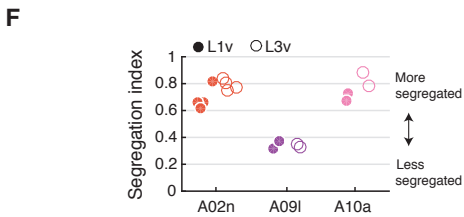

Supplement: supp [file elife_poa_e29089_Figure_2_figure_supplement_2.pdf › elife_poa_e29089_Figure_2_figure_supplement_2.pdf]

**A**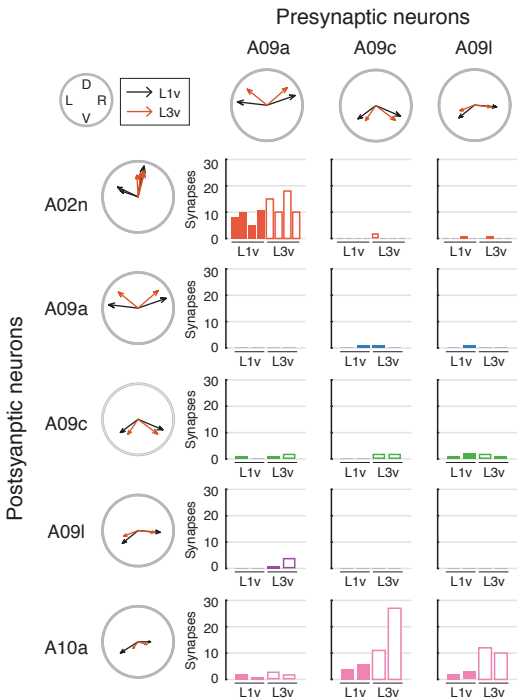**B**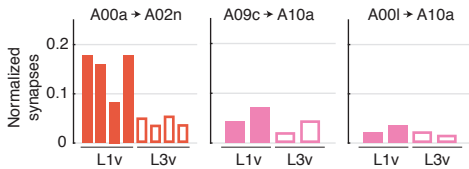**C**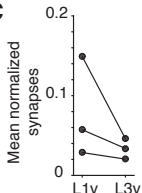

Supplement: supp [file elife_poa_e29089_Figure_3_figure_supplement_1.pdf › elife_poa_e29089_Figure_3_figure_supplement_1.pdf]

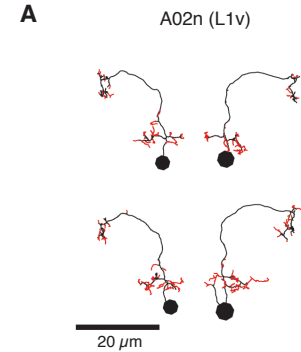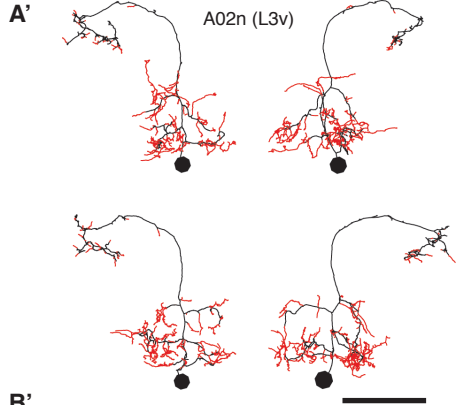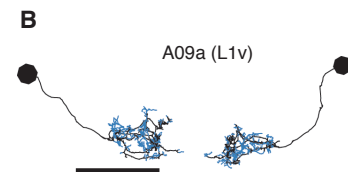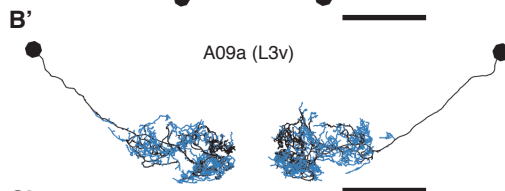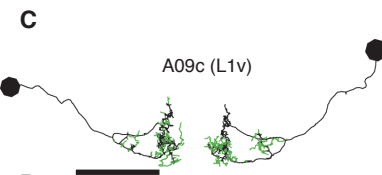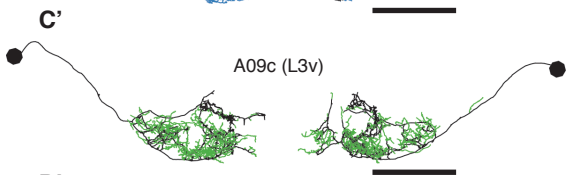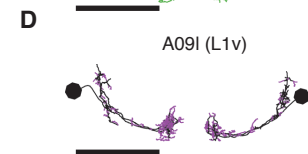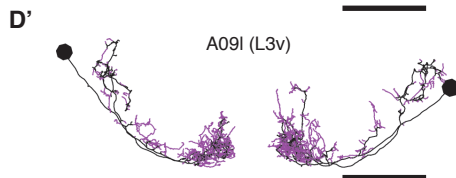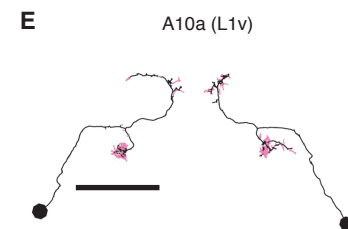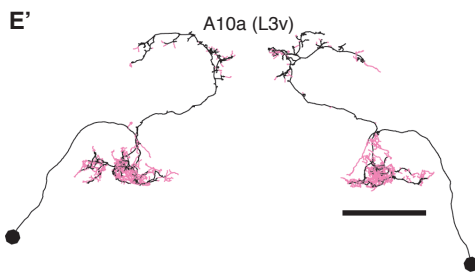

Supplement: supp [file elife_poa_e29089_Figure_5_figure_supplement_1.pdf › elife_poa_e29089_Figure_5_figure_supplement_1.pdf]

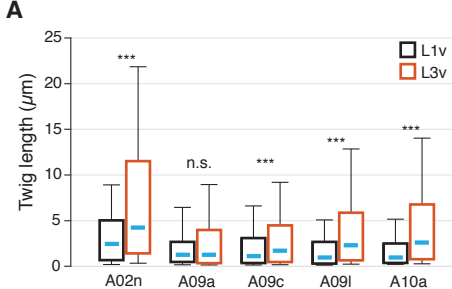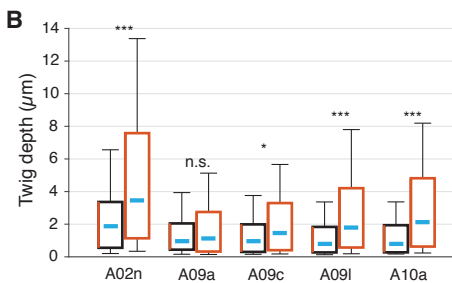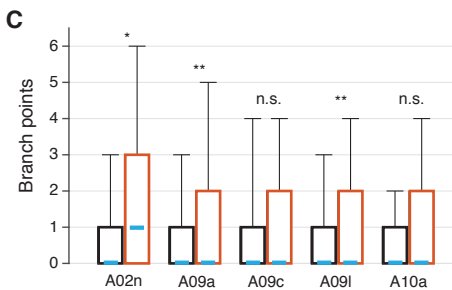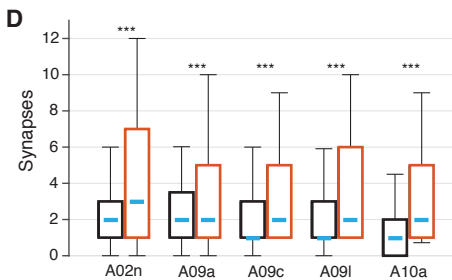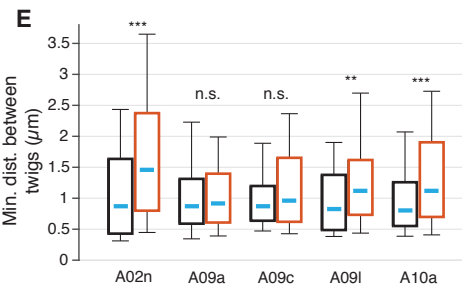

Supplement: supp [file elife_poa_e29089_Figure_6_figure_supplement_1.pdf › elife_poa_e29089_Figure_6_figure_supplement_1.pdf]
